# Supplementary material for: Hybridization of Lycium qingshuiheense and L. ningxiaense revealed using morphological, SSR markers, and chloroplast genomic data
Source: Research Square preprint supplement (doi:10.21203/rs.3.rs-5874276/v1), 2025-03-27
Supplement: Supplementary file 1 [file 44294cba0ee418bcd15adf00.xlsx]

## Sheet: Table S1
Table S1 Chloroplast assemble and annotation information of four Lycium species
species	Full Sequence		LSC regione		SSC regione		IR region		Number of genes	Number of protencoding genes	Number of rRNA genes	Number of tRNA genes	Collection number	Genbank accession
	Length	GC content	Length	GC ontent	Length	GC content	Length	GC content
Lycium ruthenicum	154966	0.379	85973	0.3598	18203	0.3234	25395	0.4319	132	86	8	37	zlnmu2022214-1	PV013648
	154966	0.379	85973	0.3598	18203	0.3234	25395	0.4319	132	86	8	37	zlnmu2022214-2	PV013649
	154966	0.379	85973	0.3598	18203	0.3234	25395	0.4319	132	86	8	37	zlnmu2022214-3	PV013650
	154893	0.379	85895	0.3598	18208	0.3232	25395	0.4319	132	86	8	37	zlnmu2022235-1	PV013651
	154830	0.379	85831	0.3598	18209	0.3231	25395	0.4319	132	86	8	37	zlnmu2022235-2	PV013652
	154844	0.379	85844	0.3598	18208	0.3232	25396	0.4318	132	86	8	37	zlnmu2022235-3	PV013653
	154894	0.379	85896	0.3598	18208	0.3232	25395	0.4319	132	86	8	37	zlnmu2022235-4	PV013654
L. barbarum	155093	0.379	85987	0.3593	18190	0.3235	25458	0.4314	132	86	8	37	zlnmu2022044-1	PV013665
	155097	0.379	85991	0.3592	18190	0.3235	25458	0.4314	132	86	8	37	zlnmu2022044-2	PV013666
	155097	0.379	85991	0.3592	18190	0.3235	25458	0.4314	132	86	8	37	zlnmu2023119-1	PV013667
	155097	0.379	85991	0.3592	18190	0.3235	25458	0.4314	132	86	8	37	zlnmu2023119-2	PV013668
	154960	0.379	85946	0.3594	18116	0.3233	25449	0.4315	132	86	8	37	zlnmu2022282-1	PV013669
	154960	0.379	85946	0.3594	18116	0.3233	25449	0.4315	132	86	8	37	zlnmu2022282-2	PV013670
	155054	0.379	85940	0.3593	18204	0.3233	25455	0.4314	132	86	8	37	zlnmu2022308-1	PV013671
	155054	0.379	85940	0.3593	18204	0.3233	25455	0.4314	132	86	8	37	zlnmu2022308-2	PV013672
	155090	0.379	85984	0.3593	18190	0.3235	25458	0.4314	132	86	8	37	zlnmu2022308-3	PV013673
	155148	0.379	86033	0.3593	18209	0.3232	25453	0.4314	132	86	8	37	zlnmu2022308-4	PV013674
L. qingshuiheense	154892	0.379	85894	0.3598	18208	0.3232	25395	0.4319	132	86	8	37	zlnmu2022307-1	PV013655
	154892	0.379	85894	0.3598	18208	0.3232	25395	0.4319	132	86	8	37	zlnmu2022307-2	PV013656
	154892	0.379	85894	0.3598	18208	0.3232	25395	0.4319	132	86	8	37	zlnmu2022307-3	PV013657
	154892	0.379	85894	0.3598	18208	0.3232	25395	0.4319	132	86	8	37	zlnmu2022307-4	PV013658
	154892	0.379	85894	0.3598	18208	0.3232	25395	0.4319	132	86	8	37	zlnmu2022307-5	PV013659
L. ningxiaense	154892	0.379	85894	0.3598	18208	0.3232	25395	0.4319	132	86	8	37	zlnmu2022234-1	PV013660
	154892	0.379	85894	0.3598	18208	0.3232	25395	0.4319	132	86	8	37	zlnmu2022234-2	PV013661
	154892	0.379	85894	0.3598	18208	0.3232	25395	0.4319	132	86	8	37	zlnmu2022234-3	PV013662
	154892	0.379	85894	0.3598	18208	0.3232	25395	0.4319	132	86	8	37	zlnmu2022234-4	PV013663
	154892	0.379	85894	0.3598	18208	0.3232	25395	0.4319	132	86	8	37	zlnmu2022234-5	PV013664

## Sheet: Table S2
Table S2 Comparison of cp genomes protein-coding genes
gene	Total site num	Pl site num	Percent of Pl site (%)
accD	89	1530	5.81699
atpA	5	1524	0.328084
atpB	4	1497	0.267201
atpE	3	402	0.746269
atpF	3	555	0.540541
atpH	3	246	1.21951
atpI	2	744	0.268817
ccsA	6	942	0.636943
cemA	5	690	0.724638
clpP	3	591	0.507614
matK	10	1530	0.653595
ndhA	1	1092	0.0915751
ndhB	2	1533	0.130463
ndhC	3	363	0.826446
ndhD	11	1521	0.723208
ndhE	3	306	0.980392
ndhF	12	2223	0.539811
ndhG	4	531	0.753296
ndhH	2	1182	0.169205
ndhI	4	504	0.793651
ndhJ	3	477	0.628931
ndhK	3	855	0.350877
petA	5	963	0.519211
petB	4	648	0.617284
petD	4	483	0.828157
petG	3	114	2.63158
petL	3	96	3.125
petN	3	90	3.33333
psaA	1	2253	0.0443853
psaB	2	2205	0.0907029
psaC	3	246	1.21951
psaI	3	111	2.7027
psaJ	3	135	2.22222
psbA	1	1062	0.094162
psbB	1	1527	0.0654879
psbC	4	1422	0.281294
psbD	1	1062	0.094162
psbE	3	252	1.19048
psbF	3	120	2.5
psbH	3	222	1.35135
psbI	3	111	2.7027
psbJ	4	123	3.25203
psbK	4	186	2.15054
psbL	3	198	1.51515
psbM	3	105	2.85714
psbN	3	132	2.27273
psbT	3	105	2.85714
psbZ	4	189	2.1164
rbcL	7	1458	0.48011
rpl2	3	825	0.363636
rpl14	3	369	0.813008
rpl16	3	405	0.740741
rpl20	3	387	0.775194
rpl22	4	468	0.854701
rpl23	3	282	1.06383
rpl32	22	168	13.0952
rpl33	3	201	1.49254
rpl36	3	114	2.63158
rpoA	5	1014	0.493097
rpoB	1	1527	0.0654879
rpoC1	6	2067	0.290276
rpoC2	15	4179	0.358938
rps2	6	711	0.843882
rps3	5	657	0.761035
rps4	6	606	0.990099
rps7	3	468	0.641026
rps8	3	405	0.740741
rps11	4	417	0.959233
rps12	3	375	0.8
rps14	3	303	0.990099
rps15	5	264	1.89394
rps16	4	267	1.49813
rps18	1	306	0.326797
rps19	4	279	1.43369
ycf1	63	5700	1.10526
ycf2	5	6876	0.0727167
ycf3	3	507	0.591716
ycf4	5	555	0.900901
ycf15	3	264	1.13636
Total	465	67422	0.692

## Sheet: Table S3
Table S3 The statistical data of 12 morphological traits for 90 specimens from four Lycium species used in this study.
species name	Speciemen/Collect number	Code	Locality (Province, county)	Identification/Approbation	Source (herbarium/sample)	Petiole length	Leaf length	Leaf width	Leaf area	Flower length	Corolla radius	Tube length	Corolla lobes	Angle between corolla-tube	Fruit color
															R	G	B
L. barbarum	NMU 00472	zlnmu2022012	Ningxia:Linwu county	Determined by authors	sample	0.462	3.574	0.656	1.513	1.036	1.091	0.436	0.35	135.928	196	67	28
L. barbarum	NMU 00473	zlnmu2022012	Ningxia:Linwu county	Determined by authors	sample	0.452	4.089	0.629	1.773	1.285	0.867	0.516	0.416	148.046	214	82	67
L. barbarum	NMU 00474	zlnmu2022012	Ningxia:Linwu county	Determined by authors	sample	0.459	3.744	0.799	1.88	1.263	1.077	0.419	0.47	165.939	193	74	31
L. barbarum	NMU 00578	zlnmu2022044	Ningxia:Huinong county	Determined by authors	sample	0.421	3.582	0.726	1.786	0.537	1.125	0.427	0.366	140.599	199	64	34
L. barbarum	NMU 00579	zlnmu2022044	Ningxia:Huinong county	Determined by authors	sample	0.648	3.593	0.749	1.904	0.642	0.938	0.372	0.341	144.081	218	78	45
L. barbarum	NMU 00580	zlnmu2022044	Ningxia:Huinong county	Determined by authors	sample	0.3	3.346	0.68	1.646	0.543	0.863	0.338	0.409	124.067	219	84	55
L. barbarum	NMU 00581	zlnmu2022044	Ningxia:Huinong county	Determined by authors	sample	0.408	3.321	0.74	1.838	0.519	0.592	0.358	0.333	131.82	253	87	29
L. barbarum	NMU 00582	zlnmu2022044	Ningxia:Huinong county	Determined by authors	sample	0.285	3.203	0.892	1.992	0.419	0.928	0.267	0.35	156.125	218	88	74
L. barbarum	NMU 01291	zlnmu2022282	Ningxia:Zhongning county	Determined by authors	sample	0.295	3.19	0.804	1.866	0.478	0.898	0.352	0.367	140.138	226	76	52
L. barbarum	NMU 01292	zlnmu2022282	Ningxia:Zhongning county	Determined by authors	sample	0.237	3.171	0.864	1.825	0.673	0.985	0.44	0.374	145	203	62	34
L. barbarum	NMU 01293	zlnmu2022282	Ningxia:Zhongning county	Determined by authors	sample	0.295	2.253	0.398	0.581	0.515	0.963	0.304	0.37	140.856	183	63	26
L. barbarum	NMU 01315	zlnmu2022290	Ningxia:Zhongning county	Determined by authors	sample	0.238	2.2	0.469	0.724	0.541	0.985	0.319	0.384	151.605	229	84	27
L. barbarum	NMU 01316	zlnmu2022290	Ningxia:Zhongning county	Determined by authors	sample	0.237	2.225	0.361	0.519	0.883	0.632	0.376	0.308	157.482	204	75	33
L. barbarum	NMU 01317	zlnmu2022290	Ningxia:Zhongning county	Determined by authors	sample	0.249	1.798	0.428	0.467	0.845	0.736	0.361	0.265	154.771	162	46	21
L. barbarum	NMU 01369	zlnmu2022308	Ningxia:Zhongning county	Determined by authors	sample	0.41	2.616	0.545	0.816	1.151	0.68	0.521	0.375	165.055	192	66	25
L. barbarum	NMU 01370	zlnmu2022308	Ningxia:Zhongning county	Determined by authors	sample	0.424	2.346	0.83	1.335	0.995	0.678	0.49	0.267	157.285	198	88	36
L. barbarum	NMU 01371	zlnmu2022308	Ningxia:Zhongning county	Determined by authors	sample	0.279	2.351	0.723	1.147	0.718	0.562	0.416	0.234	157.59	169	63	24
L. barbarum	NMU 01375	zlnmu2022310	Ningxia:Yuanzhou county	Determined by authors	sample	0.501	2.272	1.037	1.83	0.995	0.878	0.381	0.335	147.604	210	78	39
L. barbarum	NMU 01376	zlnmu2022310	Ningxia:Yuanzhou county	Determined by authors	sample	0.226	1.85	0.478	0.648	1.171	0.825	0.497	0.286	143.402	244	88	31
L. barbarum	NMU 01377	zlnmu2022310	Ningxia:Yuanzhou county	Determined by authors	sample	0.289	2.253	0.65	1.129	1.061	0.789	0.449	0.414	134.772	209	66	24
L. barbarum	NMU 01741	zlnmu2023119	Ningxia:Litong county	Determined by authors	sample	0.297	3.939	0.737	1.894	1.375	1.002	0.658	0.4	148.88	195	65	41
L. barbarum	NMU 01742	zlnmu2023119	Ningxia:Litong county	Determined by authors	sample	0.349	3.952	0.75	2.064	1.036	1.304	0.457	0.393	143.985	200	54	15
L. barbarum	NMU 01743	zlnmu2023119	Ningxia:Litong county	Determined by authors	sample	0.285	3.979	0.798	2.194	1.291	1.019	0.636	0.446	142.892	219	82	40
L. barbarum	PE 633604	6571	Ningxia:Tongxin county	Determined by Lu A.M.	herbarium	0.186	3.901	0.944	2.305	1.189	1.157	0.605	0.499	135.945	196	82	88
L. barbarum	PE 633605	7975	Ningxia:Yongning county	Determined by Kuang K.R.	herbarium	0.29	3.4	0.825	1.767	1.091	0.837	0.567	0.449	148.135	175	56	24
L. barbarum	PE 633576	6653	Ningxia:Linwu county	Determined by Lu A.M.	herbarium	0.452	4.039	0.692	1.894	1.121	0.94	0.56	0.406	157.398	200	61	30
L. barbarum	PE 633575	6432	Ningxia:Zhongwei city	Determined by Lu A.M.	herbarium	0.442	3.958	0.715	1.988	1.051	0.85	0.456	0.364	153.939	172	51	20
L. barbarum	PE 633574	2353	Ningxia:Helan county	Determined by Lu A.M.	herbarium	0.275	4.312	0.845	2.39	0.974	0.781	0.56	0.41	155.598	198	68	32
L. barbarum	PE 633572	2156	Ningxia:Yinchuan city	Determined by Lu A.M.	herbarium	0.296	4.04	0.871	2.24	0.81	0.642	0.386	0.346	149.121	238	84	32
L. barbarum	WUK 157198	2156	Ningxia:Yinchuan city	Determined by Lu A.M.	herbarium	0.314	3.813	0.816	2.093	0.807	0.832	0.386	0.375	149.695	217	91	50
L. barbarum	WUK 414702	423	Ningxia:Yanchi city	Determined by Zhang C.L.	herbarium	0.334	3.654	0.786	1.979	0.909	0.646	0.471	0.417	157.013	209	67	43
L. barbarum	WUK 322509	423	Ningxia:Yanchi city	Determined by Zhang C.L.	herbarium	0.891	2.987	0.618	1.337	0.784	0.747	0.381	0.35	147.353	188	60	21
L. barbarum	KUN 1454819	ZuoZh167	Ningxia:Zhongning county	Determined by Li X.W.	herbarium	0.636	3.217	0.556	1.417	0.675	0.586	0.261	0.278	157.305	230	68	29
L. barbarum	WUK 460609	4247	Ningxia:Zhongwei city	Determined by Zhang C.L.	herbarium	0.882	3.733	0.555	1.508	1.254	0.988	0.565	0.448	161.938	197	64	19
L. barbarum	WUK 460608	4247	Ningxia:Zhongwei city	Determined by Zhang C.L.	herbarium	0.766	3.494	0.595	1.465	1.277	1.103	0.581	0.484	141.708	211	73	45
L. barbarum	PE 633602	4390	Ningxia:Lanzhou city	Determined by Lu A.M.	herbarium	0.601	2.7	0.526	1.04	0.813	0.675	0.377	0.341	153.762	221	83	44
L. barbarum	WUK 462055	3758	Ningxia:Yanchi county	Determined by Zhang C.L.	herbarium	0.521	3.32	0.626	1.666	0.856	0.763	0.41	0.385	154.196	208	77	21
L. barbarum	WUK 463312	3314	Ningxia:Linwu county	Determined by Zhang C.L.	herbarium	0.436	3.783	0.587	1.634	0.732	0.687	0.371	0.361	152.508	183	83	33
L. barbarum	WUK 463311	3314	Ningxia:Linwu county	Determined by Zhang C.L.	herbarium	0.333	3.06	0.634	1.424	0.767	0.682	0.351	0.305	138.021	167	62	30
L. barbarum	WUK 462980	3608	Ningxia:Taole county	Determined by Zhang C.L.	herbarium	0.376	2.817	0.557	1.29	0.685	0.619	0.354	0.22	148.726	177	64	24
L. barbarum	WUK 461455	3448	Ningxia:Linwu county	Determined by Zhang C.L.	herbarium	0.368	2.785	0.503	1.076	0.947	0.682	0.536	0.324	143.415	205	70	40
L. barbarum	WUK 461254	3985	Ningxia:Tongxin county	Determined by Zhang C.L.	herbarium	0.651	2.981	0.773	1.629	1.049	0.834	0.39	0.305	146.369	222	83	28
L. barbarum	WUK 461255	3985	Ningxia:Tongxin county	Determined by Zhang C.L.	herbarium	0.445	3.832	0.533	1.58	0.838	0.649	0.363	0.313	150.836	233	85	45
L. barbarum	WUK 460832	4371	Ningxia:Zhongwei city	Determined by Zhang C.L.	herbarium	0.73	3.212	0.636	1.761	0.807	0.687	0.44	0.304	142.869	206	72	45
L. barbarum	WUK 460833	4371	Ningxia:Zhongwei city	Determined by Zhang C.L.	herbarium	0.614	2.571	0.597	1.27	1.036	1.304	0.457	0.393	143.985	221	78	38
L. barbarum	WUK 414146	179	Ningxia:Yanchi county	Determined by Zhang C.L.	herbarium	0.293	2.776	0.486	1.153	1.291	1.019	0.636	0.446	142.892	214	55	23
L. barbarum	WUK 156528	1653	Ningxia:Linwu county	Determined by Cui Y.W.	herbarium	0.768	2.7	0.504	1.193	1.189	1.157	0.605	0.499	135.945	211	72	43
L. barbarum	PE 633568	309	Ningxia:Zhongning county	Determined by Kuang K.R.	herbarium	0.521	3.32	0.626	1.666	0.742	0.887	0.685	0.413	150.331	217	69	43
L. barbarum	WUK 452328	5268	Ningxia:Tongxin county	Determined by Zhang C.L.	herbarium	0.436	3.783	0.587	1.634	1.05	0.809	0.62	0.416	132.985	206	79	36
L. barbarum	WUK 452327	5268	Ningxia:Tongxin county	Determined by Zhang C.L.	herbarium	0.333	3.06	0.634	1.424	0.865	0.601	0.571	0.291	157.213	200	66	37
L. ruthenicum	NMU 01091	zlnmu2022214	Ningxia:Yinchuan city	Determined by authors	sample	0	1.066	0.194	0.137	0.712	0.587	0.352	0.246	157.688	25	22	31
L. ruthenicum	NMU 01091	zlnmu2022214	Ningxia:Yinchuan city	Determined by authors	sample	0	0.866	0.117	0.066	0.64	0.539	0.306	0.261	152.049	11	17	31
L. ruthenicum	NMU 01091	zlnmu2022214	Ningxia:Yinchuan city	Determined by authors	sample	0	0.884	0.159	0.107	0.73	0.543	0.322	0.234	135.365	11	13	12
L. ruthenicum	NMU 01154	zlnmu2022235	Ningxia:Zhongning county	Determined by authors	sample	0	0.595	0.117	0.05	1.141	0.595	0.499	0.323	151.031	9	12	17
L. ruthenicum	NMU 01154	zlnmu2022235	Ningxia:Zhongning county	Determined by authors	sample	0	0.805	0.125	0.069	1.071	0.651	0.442	0.289	150.275	29	28	44
L. ruthenicum	NMU 01154	zlnmu2022235	Ningxia:Zhongning county	Determined by authors	sample	0	0.557	0.125	0.047	0.875	0.672	0.396	0.269	133.648	24	21	32
L. ruthenicum	WUK 167644	2994	Gansu:Jiuquan city	Determined by Cui Y.W.	herbarium	0	1.096	0.177	0.125	0.828	0.484	0.588	0.266	158.161	12	12	22
L. ruthenicum	WUK 67600	11526	Shaanxi:Yulin city	Determined by Liu J.M.	herbarium	0	1.054	0.117	0.105	0.699	0.654	0.472	0.213	139.274	34	35	53
L. ruthenicum	WUK 388999	3228	Gansu:Minle county	Determined by Zhang C.L.	herbarium	0	1.006	0.139	0.102	0.878	0.648	0.659	0.249	150.018	47	46	62
L. ruthenicum	PE 672255	3739	Gansu:Wuwei city	Determined by Cui Y.W.	herbarium	0	0.616	0.135	0.048	0.837	0.694	0.57	0.274	138.765	39	38	52
L. ruthenicum	PE 672256	3299	Gansu:Minle county	Determined by Cui Y.W.	herbarium	0	0.691	0.143	0.064	0.765	0.693	0.504	0.244	140.782	11	10	16
L. ruthenicum	PE 1688253	0151	Gansu:Yongchang county	Determined by Zhang Z.Y.	herbarium	0	0.974	0.131	0.08	0.792	0.55	0.606	0.203	156.144	17	17	27
L. ruthenicum	WUK 57582	311	Ningxia:Pingluo county	Determined by Lu A.M.	herbarium	0	1.466	0.232	0.216	0.999	0.743	0.613	0.304	153.317	13	15	28
L. ruthenicum	PE 1515904	177	Gansu:Dunhuang county	Determined by authors	herbarium	0	1.571	0.249	0.205	0.779	0.644	0.499	0.208	144.161	27	26	44
L. ruthenicum	PE 672287	76	Qinghai:Golmud city	Determined by authors	herbarium	0	0.898	0.25	0.136	0.917	0.713	0.613	0.303	156.315	19	19	27
L. ruthenicum	PE 1515906	76	Qinghai:Golmud city	Determined by authors	herbarium	0	1.019	0.191	0.111	0.854	0.607	0.551	0.246	150.044	2	3	7
L. ruthenicum	PE 672288	181	Qinghai:Dulan county	Determined by authors	herbarium	0	0.885	0.096	0.03	1.064	0.656	0.753	0.285	154.787	3	4	8
L. ruthenicum	PE 672275	181	Qinghai:Dulan county	Determined by authors	herbarium	0	0.962	0.207	0.128	0.92	0.53	0.695	0.233	154.906	28	25	42
L. ruthenicum	PE 672285	68	Qinghai:Golmud city	Determined by authors	herbarium	0	0.678	0.21	0.098	0.958	0.609	0.686	0.298	162.593	20	18	32
L. ruthenicum	PE 672284	246	Qinghai:Haixi city	Determined by Zhang Z.Y.	herbarium	0	1.053	0.072	0.069	0.989	0.624	0.677	0.244	155.638	7	10	15
L. ruthenicum	HNWP00026242	Gao2018036	Qinghai:Dulan county	Determined by Gao Q.B.	herbarium	0	0.642	0.129	0.053	0.964	0.577	0.711	0.217	156.401	21	25	34
L. ruthenicum	HNWP 100067	0347	Qinghai:Dulan county	Determined by Lu S.L.	herbarium	0	0.869	0.143	0.084	0.854	0.609	0.625	0.262	161.359	12	15	20
L. ruthenicum	PE 672226	7036	Shaanxi:Yulin city	Determined by Cai K.Q.	herbarium	0	1.025	0.17	0.144	0.877	0.583	0.587	0.236	153.048	24	24	34
L. ruthenicum	WUK 67600	11526	Shaanxi:Yulin city	Determined by authors	herbarium	0	0.915	0.185	0.102	1.132	0.742	0.804	0.255	157.186	16	19	28
L. ruthenicum	WUK 297802	4117	Xinjiang:Karamay city	Determined by Wang H.J.	herbarium	0	0.771	0.178	0.11	0.846	0.614	0.632	0.321	155.725	16	14	27
L. ruthenicum	PE 672227	s.n.	Ningxia	Determined by Zhang Z.Y.	herbarium	0	0.754	0.132	0.059	0.924	0.619	0.661	0.27	154.207	9	8	13
L. ruthenicum	PE 672289	3086	Qinghai:Golmud city	Determined by Zhang Z.Y.	herbarium	0	0.888	0.122	0.083	0.954	0.654	0.73	0.245	162.037	24	22	36
L. ruthenicum	WUK 432838	2106	Ningxia:Qingtongxia city	Determined by Zhang C.L.	herbarium	0	0.549	0.11	0.048	0.923	0.693	0.697	0.274	156.85	7	8	12
L. ruthenicum	HIMC 31184	83132	Inner Mongolia:Alxa city	Determined by Lei X.T.	herbarium	0	1.023	0.16	0.141	1.027	0.635	0.735	0.311	155.08	7	10	15
L. ruthenicum	WUK 462511	3471	Ningxia:Linwu county	Determined by Zhang C.L.	herbarium	0	1.155	0.126	0.088	1.004	0.745	0.73	0.352	149.676	3	4	8
L. ruthenicum	IGA 0010789	QU-S001	Inner Mongolia:Alxa city	Determined by Qu S.	herbarium	0	0.833	0.137	0.07	0.831	0.541	0.591	0.259	151.687	13	13	21
L. ruthenicum	IGA 0010790	QU-S001	Inner Mongolia:Alxa city	Determined by Qu S.	herbarium	0	1.082	0.136	0.086	0.873	0.596	0.652	0.304	160.615	29	25	39
L. ruthenicum	IGA 0010791	QU-S001	Inner Mongolia:Alxa city	Determined by Qu S.	herbarium	0	1.041	0.142	0.082	0.866	0.542	0.615	0.239	156.429	8	7	15
L. ruthenicum	KUN 1483075	ZuoZh267	Ningxia:Zhongning county	Determined by Li X.W.	herbarium	0	1.155	0.126	0.088	1.167	0.76	0.712	0.348	158.749	32	33	51
L. ruthenicum	KUN 1454953	ZHANG2017HC024	Gansu:Zhangye city	Determined by Zhang H.J.	herbarium	0	0.833	0.137	0.07	0.941	0.712	0.654	0.244	135.28	13	15	27
L. ruthenicum	KUN 1446380	ZHANG2018HC101	Gansu:Yumen county	Determined by Zhang H.J.	herbarium	0	1.082	0.136	0.086	0.711	0.594	0.513	0.242	146.953	24	26	39
L. qingshuiheense	NMU 01366	zlnmu2022307	Ningxia:Zhongning county	Determined by authors	sample	0.239	1.073	0.151	0.118	0.994	0.702	0.545	0.255	145.955	159	89	64
L. qingshuiheense	NMU 01366	zlnmu2022307	Ningxia:Zhongning county	Determined by authors	sample	0.233	0.901	0.113	0.076	0.896	0.613	0.366	0.282	149.782	164	83	38
L. qingshuiheense	NMU 01366	zlnmu2022307	Ningxia:Zhongning county	Determined by authors	sample	0.188	1.091	0.162	0.107	1.06	0.845	0.554	0.334	156.228	102	33	0
L. qingshuiheense	NMU 01367	zlnmu2022307	Ningxia:Zhongning county	Determined by authors	sample	0.105	0.987	0.146	0.105	1.054	0.68	0.472	0.313	163.395	129	46	4
L. qingshuiheense	NMU 01367	zlnmu2022307	Ningxia:Zhongning county	Determined by authors	sample	0.237	1.411	0.138	0.154	0.915	0.577	0.404	0.249	144.17	177	96	49
L. qingshuiheense	NMU 01367	zlnmu2022307	Ningxia:Zhongning county	Determined by authors	sample	0.169	0.714	0.131	0.081	0.998	0.649	0.409	0.235	150.687	181	98	54
L. qingshuiheense	NMU 01367	zlnmu2022307	Ningxia:Zhongning county	Determined by authors	sample	0.169	0.796	0.214	0.119	0.817	0.716	0.417	0.288	154.279	183	91	40
L. qingshuiheense	NMU 01368	zlnmu2022307	Ningxia:Zhongning county	Determined by authors	sample	0.147	0.829	0.193	0.091	1.03	0.668	0.558	0.297	157.665	183	123	95
L. qingshuiheense	NMU 01368	zlnmu2022307	Ningxia:Zhongning county	Determined by authors	sample	0.166	0.767	0.157	0.101	0.913	0.623	0.448	0.263	146.13	182	96	49
L. qingshuiheense	NMU 01368	zlnmu2022307	Ningxia:Zhongning county	Determined by authors	sample	0.207	0.924	0.108	0.062	0.999	0.577	0.417	0.218	155.618	104	24	0
L. qingshuiheense	PE 01896223	2010-01	Ningxia:Zhongning county	Holotype	herbarium	0.106	0.699	0.158	0.066	0.87	0.625	0.301	0.258	147.486	124	46	10
L. qingshuiheense	PE 01896223	2010-01	Ningxia:Zhongning county	Holotype	herbarium	0.103	0.81	0.226	0.106	0.769	0.593	0.387	0.252	160.601	196	130	95
L. qingshuiheense	PE 01896223	2010-01	Ningxia:Zhongning county	Holotype	herbarium	0.159	0.813	0.164	0.116	0.881	0.666	0.402	0.249	144.118	151	71	22
L. ningxiaense	NMU 01151	zlnmu2022234	Ningxia:Zhongning county	Determined by authors	sample	0.065	0.802	0.146	0.087	0.604	0.638	0.374	0.26	152.803	133	84	88
L. ningxiaense	NMU 01151	zlnmu2022234	Ningxia:Zhongning county	Determined by authors	sample	0.062	0.957	0.193	0.128	0.66	0.528	0.415	0.277	145.84	83	31	33
L. ningxiaense	NMU 01151	zlnmu2022234	Ningxia:Zhongning county	Determined by authors	sample	0.06	0.611	0.17	0.09	0.884	0.635	0.577	0.299	152.592	85	33	20
L. ningxiaense	NMU 01152	zlnmu2022234	Ningxia:Zhongning county	Determined by authors	sample	0.066	0.778	0.185	0.106	0.843	0.643	0.483	0.253	134.533	92	35	8
L. ningxiaense	NMU 01152	zlnmu2022234	Ningxia:Zhongning county	Determined by authors	sample	0.091	0.814	0.194	0.124	0.885	0.59	0.488	0.248	150.607	67	19	7
L. ningxiaense	NMU 01152	zlnmu2022234	Ningxia:Zhongning county	Determined by authors	sample	0.077	0.816	0.202	0.121	0.674	0.512	0.491	0.19	141.6	72	19	3
L. ningxiaense	NMU 01153	zlnmu2022234	Ningxia:Zhongning county	Determined by authors	sample	0.057	0.738	0.16	0.092	0.915	0.577	0.404	0.249	144.17	112	63	62
L. ningxiaense	NMU 01153	zlnmu2022234	Ningxia:Zhongning county	Determined by authors	sample	0.118	0.814	0.152	0.086	0.998	0.649	0.409	0.235	150.687	126	79	73
L. ningxiaense	NMU 01153	zlnmu2022234	Ningxia:Zhongning county	Determined by authors	sample	0.161	0.683	0.151	0.086	0.817	0.716	0.417	0.288	154.279	64	16	4
L. ningxiaense	PE 01896222	2010-02	Ningxia:Zhongning county	Holotype	herbarium	0.087	0.767	0.151	0.089	0.743	0.61	0.306	0.205	143.466	71	19	21
L. ningxiaense	PE 01896222	2010-02	Ningxia:Zhongning county	Holotype	herbarium	0.065	0.729	0.16	0.089	0.969	0.631	0.474	0.267	153.615	129	83	79
L. ningxiaense	PE 01896222	2010-02	Ningxia:Zhongning county	Holotype	herbarium	0.083	0.774	0.147	0.09	0.823	0.522	0.388	0.191	154.498	109	58	57
Note: The information of code, voucher ID, locality, identification, value of each trait of specimen used in PCoA were shown in this table. Fruit color(1 for red, 2 for yellowish-brown and 3 for black).

## Sheet: Table S4
Table S4 Details for the 10 microsatellite SSR loci used
Locus	Primer sequence (5'-3')	Repeats	References
SF11	CGGTCGAGGATTAGCTAGAAG	(TAT)4	Gan et al., 2020
	GGAGAAAAGAACATAAACGACAA
SF14	TTCAGTTCCCTCTCAGCCA	(TC)9	Yin et al., 2017
	TTGTTCTTGCATAAGAAATTGG
SF15	CAAAGAACAAAAGGGCTAGGA	(GGA)5	Yin et al., 2017
	TTTGTTGTTGTATCAGATCCCA
SF20	TGTGGAATTACACTGGGTATGT	(AGT)5	Yin et al., 2017
	GAGAACCGTTTCATTGATATAC
SF26	TGCCACCAATATAGAGTGTTC	(TC)8	Gan et al., 2020
	GCCCAATCTTACACCTCACAG
SF30	TATTTCACGTTGCTCCAGAAAG	(AG)9	Gan et al., 2020
	ATCGCCCCCTGAATTAAAG
SF34	TCATGCAAAATCAGACCACTAT	(ACA)7	Yin et al., 2017
	TTACGATGTGGGATTTCAC
SF68	TTCCACCATTTTGCTACTCAA	(CTC)4	Gan et al., 2020
	AAGAGATTTTTAGCCGATTGA
SF80	GGTTGTAAATCATTTCATTAAGG	(CAA)6	Gan et al., 2020
	AACAGTCGCCCTATCTTTCA
SF92	CGGGTTTCTAATGGTACCTCTA	(AAT)5	Yin et al., 2017
	TGACTCTACAAATTTGAAAAACAA
Reference:
Gan XY, Guo YQ, Gong L, Chen YC, Nie FJ, Zhang L, Song YX. 2020. Study on genetic diversity of 24 germplasm resources of Lycium bararum L. by SSR markers. Molecular Plant Breeding 18(5): 1697-1701.
Yin Y, An W, Zhao JH, Li YL, Fan YF, Cao YL. 2017. Fingerprinting and genetic diversity analysis of wolfberry cultivarsusing fluorescence-labeled SSR markers. Journal of Northwest Forestry University 32(1): 137-141.

## Sheet: Table S5
Table S5 Details of four Lycium species for genetic structural analysis
Species	Population	Number of individuals	Vouchers
L. barbarum	1	5	zlnmu2022012
	2	5	zlnmu2022044
	3	12	zlnmu2022282
	4	5	zlnmu2022380
	5	5	zlnmu2022310
	6	5	zlnmu2023119
L. ruthenicum	7	10	zlnmu2022214
	8	10	zlnmu2022235
L. ningxiaense	9	5	zlnmu2022234
L. qingshuiheense	10	5	zlnmu2022307
