# Supplementary material for: Hybridization of Lycium qingshuiheense and L. ningxiaense revealed using morphological, SSR markers, and chloroplast genomic data
Source: Research Square preprint supplement (doi:10.21203/rs.3.rs-5874276/v1), 2025-03-27

Hybridization of *Lycium qingshuiheense* and *L. ningxiaense* revealed using morphological, SSR markers, and chloroplast genomic data

Lei Zhang1, Chaopan Zhang1, Erdong Zhang1, Yuqing Wei1, Guoqi Zheng2*

1 Key Laboratory of Ecological Protection of Agro-Pastoral Ecotones in the Yellow River Basin, National Ethnic Affairs Commission of the People’s Republic of China, School of Biological Science & Engineering, North Minzu University, Yinchuan 750021, China

2 Key Laboratory of the Ministry of Education for Protection and Utilization of Special Biological Resources in the Western, School of Life Science, Ningxia University, Yinchuan 750021, Ningxia, China

*Corresponding author

Guoqi Zheng, Key Laboratory of the Ministry of Education for Protection and Utilization of Special Biological Resources in the Western, School of Life Science, Ningxia University, Yinchuan 750021, Ningxia, China.

Email: zhengguoqi1977@163.com

**Supplementary Infomation**

**Figure S1.** Boxplots of nine quantitative traits for four *Lycium* species. (petiole length, leaf length, leaf width, leaf area, corolla radius, fruit color (R), fruit color (B), flower length and angle between corolla tube)

**Figure S2** Phylogenetic tree obtained using the Bayesian inference (BI) methods for the four *Lycium* species based on 79 PCGs.

**Figure S3** Phylogenetic tree obtained using the maximum likelihood (ML) methods for the four *Lycium* species based on complete cp genomes.

**Figure S4** Phylogenetic tree obtained using the Bayesian inference (BI) methods for the four *Lycium* species based on complete cp genomes.

**Figure S1**


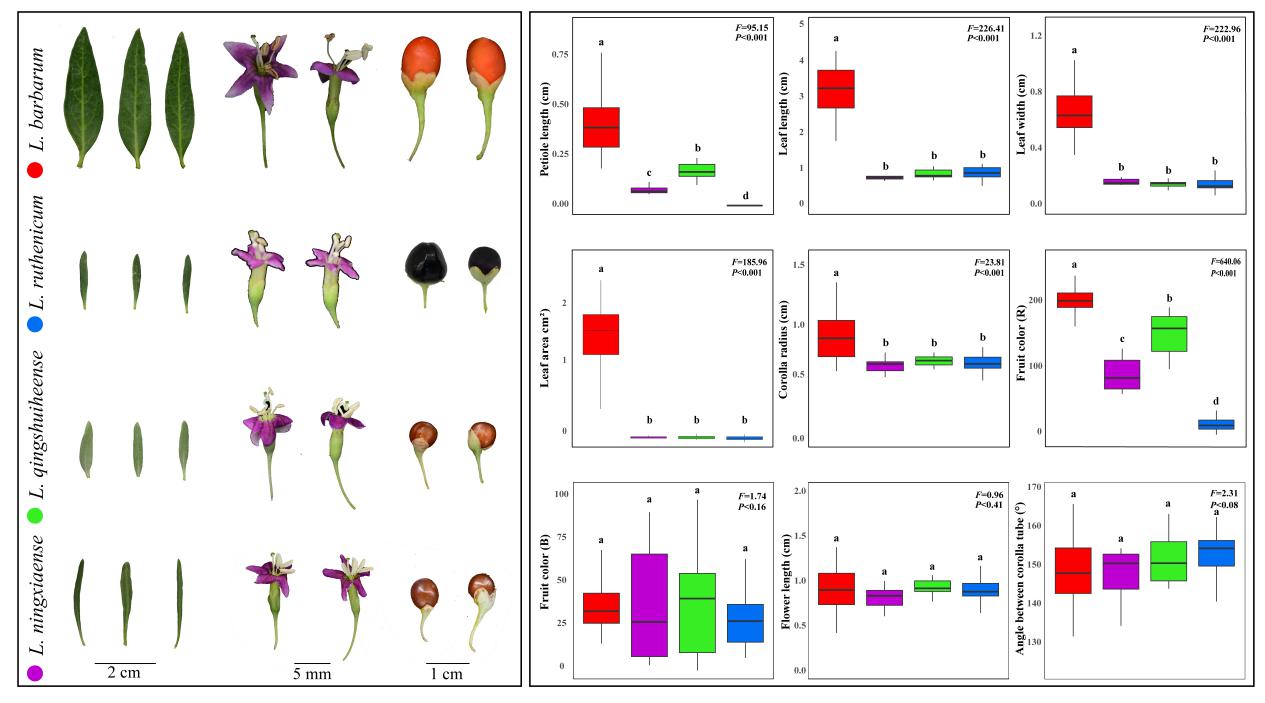


**Figure S2**


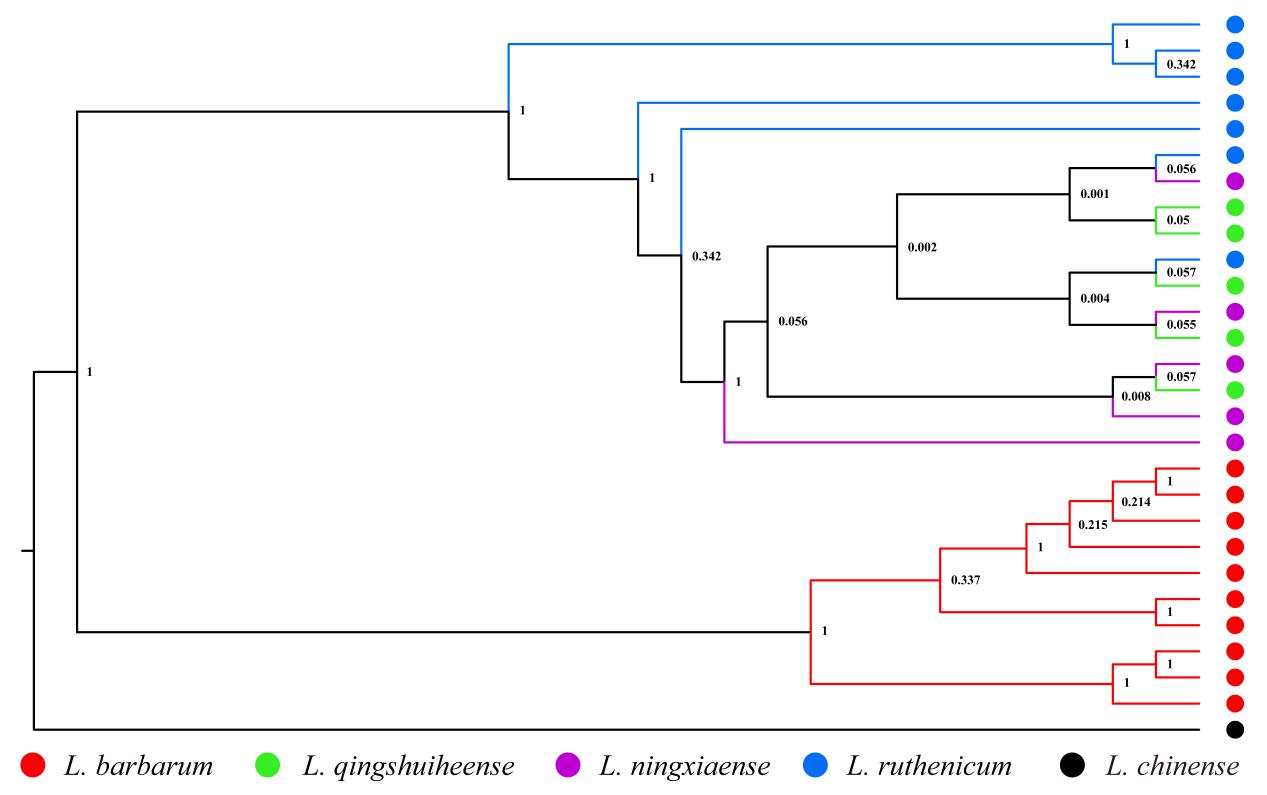


**Figure S3**

**
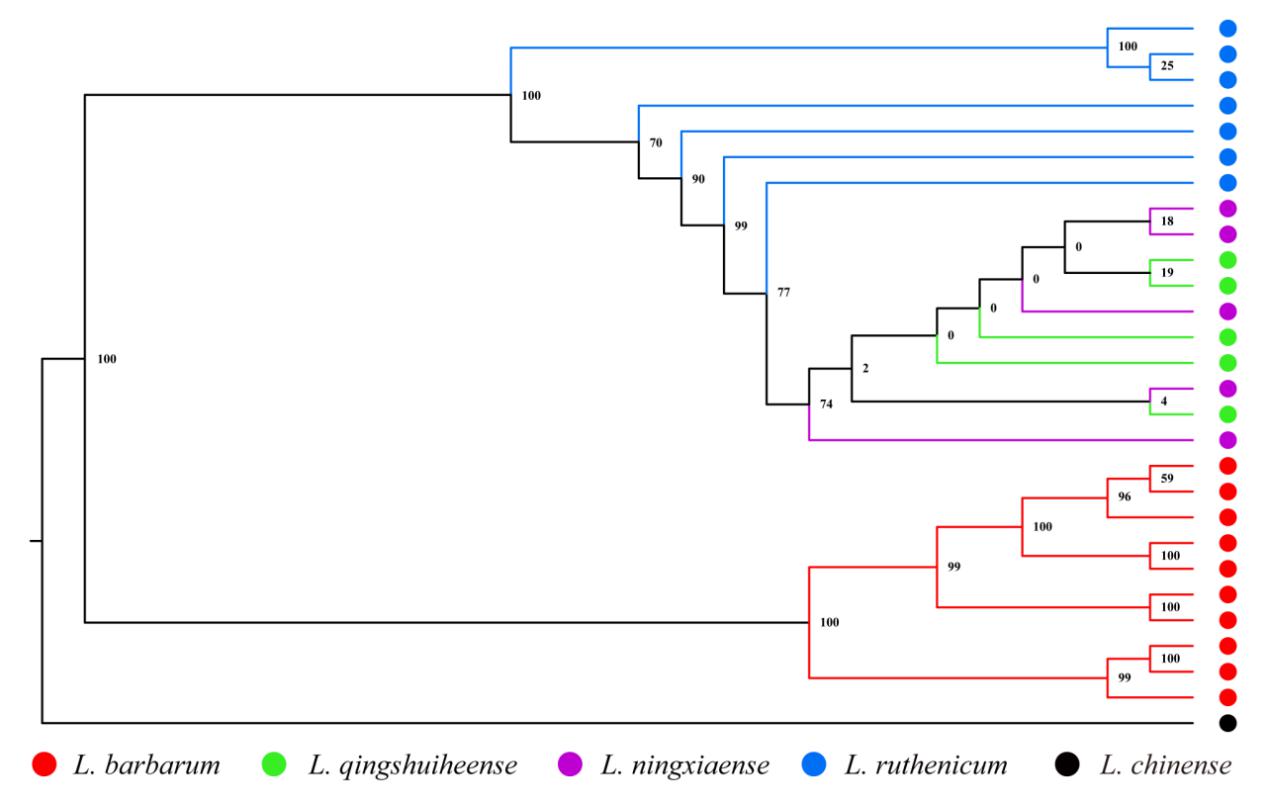
**

**Figure S4**


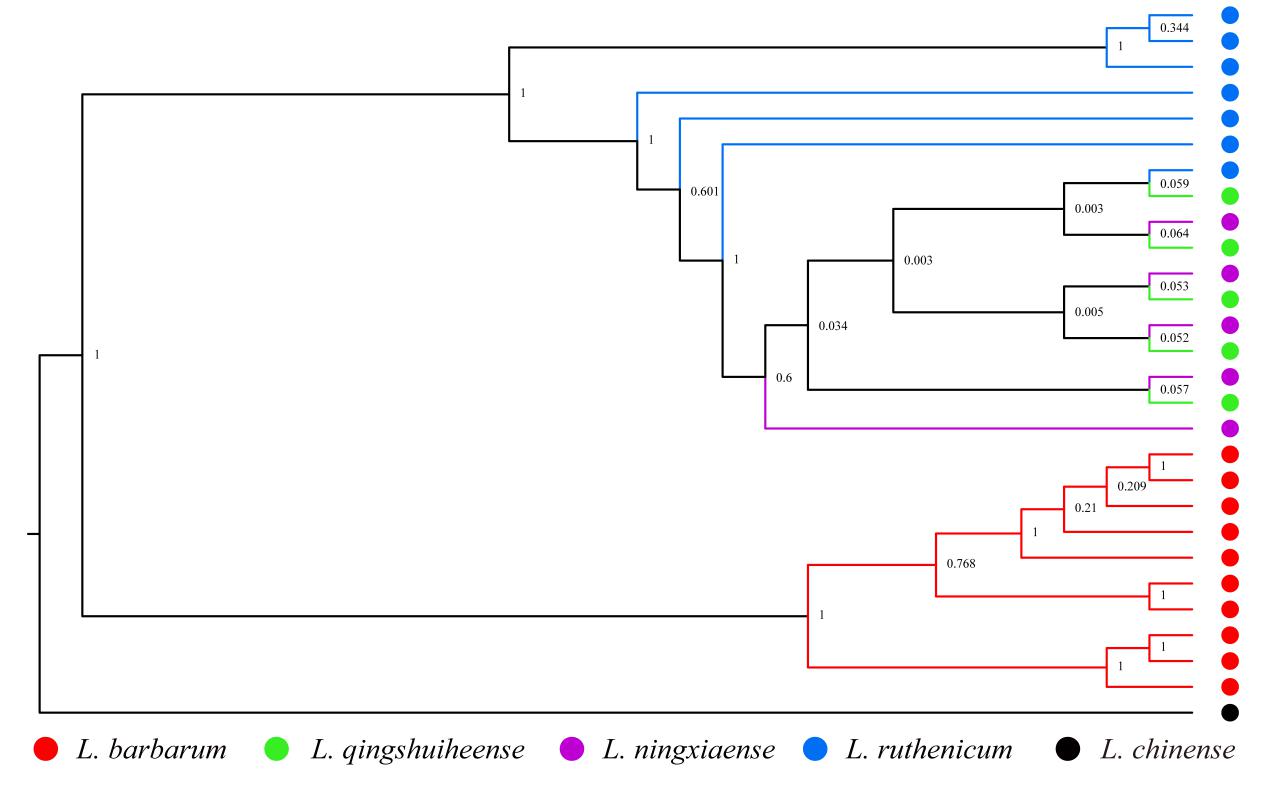

Supplement: Supplementary file 2 [file 80c5f1ff0b15b874f70ec99f.docx]
